# Supplementary material for: Toxic Effects of Gemcitabine and Paclitaxel Combination: Chemotherapy Drugs Exposure in Zebrafish
Source: MDPI journal article supplement (doi:10.3390/toxics11060544), 2023-06-20
Supplement: s1 [file s1]

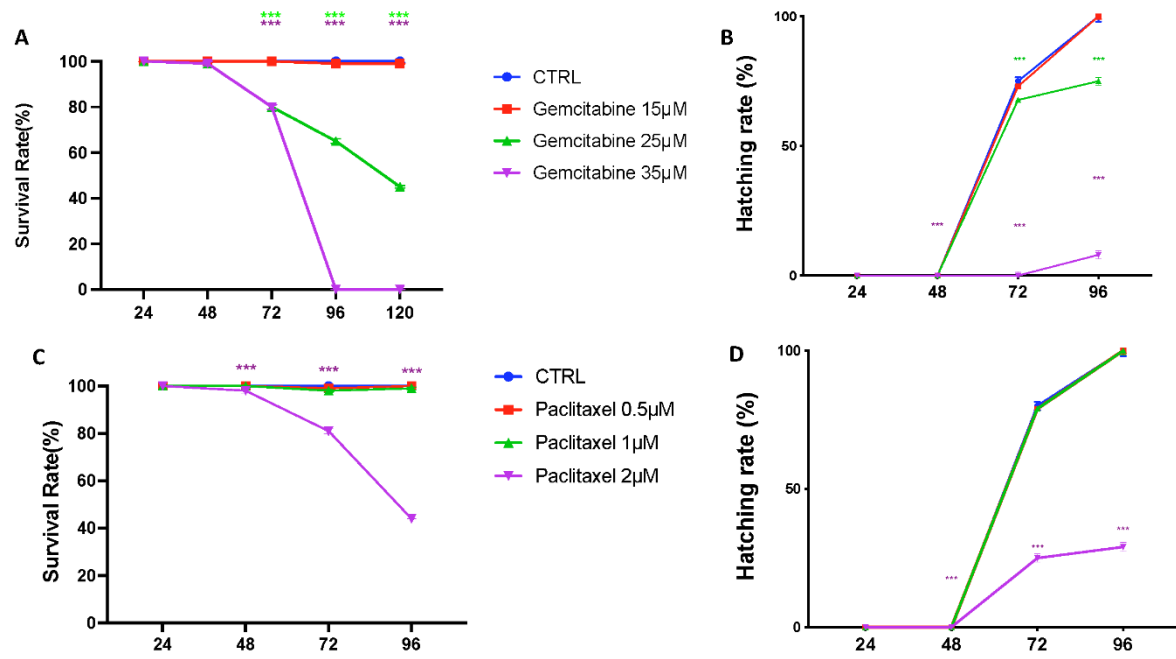

**Figure S1.** Survival rate and hatching of embryos exposed to different concentrations GEM and PAX. (A) Survival rate of GEM (gemcitabine) from 24 to 96hpf, (B) Hatching rate of GEM (gemcitabine) from 24 to 96hpf, (C) Survival rate of PAX (paclitaxel) from 24 to 96hpf, (D) Hatching rate of PAX (paclitaxel) from 24 to 96hpf.
